1 **Evolution increases ecosystem temporal stability and recovery from a flood in**  
2 **grassland communities**

3

4 Sofia J. van Moorsel<sup>1</sup>, Terhi Hahl<sup>1</sup>, Owen L. Petchey<sup>1</sup>, Anne Ebeling<sup>2</sup>, Nico  
5 Eisenhauer<sup>3,4</sup>, Bernhard Schmid<sup>1</sup> and Cameron Wagg<sup>1\*</sup>

6

7 <sup>1</sup> URPP Global Change and Biodiversity and Department of Evolutionary Biology  
8 and Environmental Studies, University of Zürich, Winterthurerstrasse 190, CH-8057,  
9 Switzerland

10 <sup>2</sup> Institute of Ecology and Evolution, University of Jena, Dornburger Str. 159, 07743  
11 Jena, Germany

12 <sup>3</sup> German Centre for Integrative Biodiversity Research (iDiv) Halle-Jena-Leipzig,  
13 Deutscher Platz 5e, 04103 Leipzig, Germany

14 <sup>4</sup> Institute of Biology, Leipzig University, Johannisallee 21, 04103 Leipzig, Germany

15 \* Correspondence should be addressed to:

16 C.W. [cameron.wagg@ieu.uzh.ch](mailto:cameron.wagg@ieu.uzh.ch)

17

18 **Keywords:** community evolution | compensatory dynamics | environmental  
19 perturbation | flood | grassland biodiversity | recovery | resilience | resistance | stability

20

21 **Abstract**

22 Understanding factors that increase ecosystem stability is critical in the face of  
23 environmental change. Biodiversity plays a key role in buffering ecosystems against  
24 disturbances such as extreme climatic events. The evolution of biological  
25 communities within their local environment may also increase ecosystem stability and  
26 resilience, but this has yet to be tested. Here, we provide evidence for such  
27 evolutionary effects using a long-term grassland biodiversity experiment.  
28 Communities of plants with a history of co-occurrence (co-selected communities)  
29 were temporally more stable at low diversity than the same communities of plants  
30 with no such history (naïve communities). Furthermore, co-selected communities  
31 exhibited greater recovery following a major flood, resulting in more stable post-flood  
32 productivity. These results demonstrate that community evolution can increase  
33 ecosystem stability under normal circumstances and in response to extreme  
34 disturbance, but also suggest that high diversity can in part compensate for  
35 evolutionary naïvety.

36

## 37 **Introduction**

38 It has long been recognized that greater biodiversity can stabilize ecosystem  
39 functioning<sup>1-5</sup>. Such findings emphasize the importance of biodiversity for  
40 maintaining ecosystem functioning under future anticipated extreme climatic  
41 events<sup>6,7</sup>. The positive effect of biodiversity on maintaining ecosystem productivity  
42 over many years can be attributed to greater temporal stability and improved  
43 resistance, recovery and resilience to environmental disturbances<sup>4,8,9</sup>. Greater  
44 resistance increases ecosystem stability by reducing the loss in productivity<sup>10</sup>, while  
45 greater recovery increases the amount of productivity that the ecosystem can regain  
46 after the disturbance-induced loss<sup>11</sup>. Together resistance and recovery determine  
47 ecosystem resilience as we define it here, namely how ecosystem productivity differs  
48 between pre- and post-disturbance states<sup>12</sup>. Consequently, how plant diversity  
49 stabilizes ecosystem productivity through mediating ecosystem resistance, recovery  
50 and resilience has become a focal question in ecology<sup>3,4,9,10,13,14</sup>.

51 Many of the underlying mechanisms by which diversity stabilizes ecosystem  
52 productivity are based on the inherent differences among species in their niche  
53 requirements and life strategies<sup>15-19</sup>. For instance, different plant species may exhibit  
54 high performance under different environmental conditions (termed response  
55 diversity). Consequently, a greater plant diversity may stabilize ecosystem  
56 productivity under normally fluctuating environmental conditions and especially  
57 under environmental disturbance, because there is a higher probability that some  
58 species may perform well at any given time point. Asynchrony of species  
59 performances, derived from interspecific differences in responses to environmental  
60 variation, can thus allow more diverse ecosystems to resist more or recover faster to  
61 maintain performance, often referred to as the insurance or portfolio effect<sup>16-18</sup>.

62 Species asynchrony has been conceptually and empirically demonstrated as a  
63 mechanism by which biodiversity can stabilize ecosystem productivity<sup>16,18,20–23</sup>.

64 There are a number of community and population attributes associated with  
65 ecosystem stability. Ecosystem resistance, recovery and resilience that underlie  
66 stability may be dependent upon plant diversity<sup>4,13</sup>, plant density<sup>24</sup> and plant  
67 functional traits<sup>25</sup>. However, we lack information about the importance of  
68 evolutionary processes that may be occurring over the same temporal scales across  
69 which ecosystem stability is measured<sup>26</sup>. So far, evolutionary mechanisms underlying  
70 the biodiversity–stability relationship have been considered in terms of phylogenetic  
71 relatedness that reflects evolutionary mechanisms over broad time scales<sup>27,28</sup>. It  
72 remains unclear whether evolution over short time scales can increase the stability of  
73 communities under normally fluctuating environmental conditions as well as in  
74 response to extreme climatic events by potentially improving resistance, recovery or  
75 resilience. Such evolution leading to changes at the community level is referred to as  
76 community evolution<sup>29</sup>, but so far has almost exclusively been studied in microbial  
77 ecosystems<sup>30–32</sup>.

78 Here we test the hypothesis that short-term community evolution in grassland  
79 ecosystems will affect ecosystem stability and that this effect may depend on plant  
80 diversity, which was experimentally manipulated. This hypothesis is based on  
81 community evolution increasing niche differentiation<sup>26</sup>, and niche differentiation  
82 having the potential to affect community biomass<sup>29</sup>, population variability, and  
83 population synchrony, all of which contribute to ecosystem stability. We measured  
84 ecosystem stability as temporal variation in primary productivity during normal  
85 environmental fluctuations. Furthermore, we measured ecosystem responses to  
86 disturbance by an extreme event, a naturally occurring major flood, as resistance,

87 recovery, resilience and post-disturbance stability of productivity<sup>33</sup>. We compared co-  
88 selected communities with naïve communities of 1, 2, 4 or 8 plant species. Co-  
89 selected communities were assembled with offspring from individuals that had co-  
90 occurred in the same communities over 8 years. Naïve communities were assembled  
91 with individuals that were obtained from the same supplier that provided the original  
92 seeds at the beginning of the 8-year selection period of the co-selected  
93 communities<sup>26,29</sup>. To take into account the importance of the local environment, plant  
94 communities were planted in their home soil (“native”) or a sterilized soil that was  
95 inoculated with either their native soil biota (“inoculated”) or with soil biota from a  
96 different field (“neutral”). Co-selected and naïve communities were grown from  
97 2012–2015 at the field site in Jena, Germany. Productivity was measured in May of  
98 each year and in August of 2012–2014.

99

## 100 **Results**

### 101 *Temporal stability, asynchrony and population variation*

102 Community evolution significantly modified the diversity–stability  
103 relationship and the diversity–population variation relationship (interaction plant  
104 history x species richness in Table 1). Stability more strongly increased with diversity  
105 in the naïve than in the co-selected communities (Fig. 1a). Conversely, population  
106 variation increased more strongly with diversity in the co-selected than in the naïve  
107 communities. Species asynchrony significantly increased with diversity (main effect  
108 of species richness in Table 1). Different soil treatments did not alter the diversity–  
109 stability relationship (Fig. 1b) and generally, the community-evolution treatments and  
110 soil treatments did not affect stability, asynchrony and population variation (Table 1).

111 The different diversity–stability relationships between the two community-

112 evolution treatments were related to different asynchrony and stability relationships.  
113 That is, asynchrony of species-level productivity fluctuations was less positively  
114 correlated with ecosystem stability in co-selected than in naïve communities or, in  
115 other words, community evolution significantly reduced the coupling between  
116 species-level asynchrony and ecosystem stability (Fig. 1c). In contrast to the altered  
117 relationship between asynchrony and stability, community evolution did not alter the  
118 relationship between population variation and stability (Fig. 1d).

119

### 120 *Responses to an extreme flood event*

121 A naturally occurring flood in early summer 2013 had devastating effects on  
122 the plant communities and reduced productivity in the corresponding time interval  
123 (Fig. 2). Whereas diversity had no general effect on resistance to the flood, the  
124 diversity–resistance relationships differed significantly between the two community-  
125 evolution treatments (Table 2). This resulted from the co-selected communities  
126 having a generally lower resistance at high diversity (Fig. 3a; Table 2). Native and  
127 inoculated soil treatments resulted in highest resistance to the flood, in particular at  
128 high diversity (Fig. 3b).

129 Ecosystem recovery following the flood was independently increased by  
130 diversity and by community evolution, but soil treatments had no significant effects  
131 (Fig. 3c, d; Table 2). At low (but not at high) diversity, co-selected communities were  
132 more resilient (Fig. 3e). On the other hand, similar to temporal stability, high diversity  
133 could compensate for the reduced resilience of naïve as compared with co-selected  
134 communities (marginally significant interaction plant history x species richness in  
135 Table 2). The effect of species richness on resilience was strongest on the soil that  
136 was inoculated with native soil because of the very low resilience of the

137 corresponding monocultures (Fig. 3f; Table 2). Species turnover was not influenced  
138 by community-evolution or soil treatments, but did increase with species richness  
139 (Fig. S1; Table S1). Whereas before the flood, co-selected and naïve communities  
140 were equally stable (Fig. 4a), the flood event significantly destabilized post-flood  
141 productivity in the naïve compared with the co-selected communities (Fig. 4b; Table  
142 S2).

143

#### 144 **Discussion**

145         The potential for greater diversity to maintain a greater ecosystem functioning  
146 over time has been well recognized<sup>1-5</sup>. Additionally, the positive effects of  
147 biodiversity on ecosystem functioning have been shown to strengthen over time<sup>34-36</sup>.  
148 Such changes in the functioning of plant communities may reflect evolutionary  
149 processes that occur over the same temporal scales across which ecosystem stability is  
150 being measured. For instance, there is evidence that such temporal changes in the  
151 functioning of communities may reflect rapid evolutionary increases in species  
152 complementarity and community productivity<sup>26,29,32</sup>. Yet the importance of the  
153 interactive effects of biodiversity and community evolution for ecosystem stability  
154 has not been tested so far. Our study provides strong evidence that community  
155 evolution maintained a more stable primary productivity at low diversity, which  
156 consequently altered the diversity–stability relationship under normally fluctuating  
157 environmental conditions. Furthermore, we found that co-selected communities had  
158 an overall greater recovery and post-perturbation stability following a naturally  
159 occurring extreme climatic event. In comparison to the plant diversity and  
160 community-evolution treatments, treatments simulating co-selected vs. novel soil  
161 microbial communities only had minor effects on ecosystem stability. Overall, our

162 findings demonstrate the potential importance of community-wide evolutionary  
163 processes for maintaining ecosystem functioning and highlights the need to further  
164 consider the integration of evolutionary processes in understanding biodiversity–  
165 ecosystem functioning relationships.

166         Several mechanisms could have led to the observed differences between co-  
167 selected and naïve communities. First, the changes at community level could have  
168 been due to altered species abundance distributions. However, this would have had to  
169 be related to changed performances of species due to community evolution, because  
170 co-selected and naïve communities only differed in regard to selection history but not  
171 with regard to initial species composition or environment. Furthermore, we could not  
172 detect any significant changes in species abundance distributions. This leaves a  
173 second explanation for the observed community-level effects, phenotypic changes  
174 within species. Such changes could have a genetic or other heritable basis such as  
175 epigenetic or maternal carry-over effects<sup>37</sup>. The latter are unlikely because the  
176 communities were started from seeds rather than cuttings and the effects were  
177 observed over a 4-year time span. We tested in a separate study using a reduced-  
178 representation bisulfate sequencing method<sup>38</sup> for five of the 60 species from the Jena  
179 Experiment if selection on the field site led to genetic or epigenetic changes and found  
180 evidence for genetic but not for epigenetic changes<sup>39</sup>. These genetic changes could  
181 have been due to differential mortality, growth or reproduction among the initially  
182 sown genotypes<sup>40</sup>, recombination during sexual reproduction in the field or the  
183 experimental garden or, presumably least likely, to mutation and selection, all  
184 occurring before the start of the present experiment.

185



186 *Stability, synchrony and population variation*

187 Numerous studies have shown that biodiversity increases ecosystem stability  
188 due to the effects of species asynchrony in diverse communities, allowing high  
189 compensatory population variation to be combined with low community-level  
190 variation over time<sup>15,17,22,41</sup>. Here we also observed such compensatory dynamics, but  
191 this was significantly modified by community evolution. We found that the positive  
192 diversity–stability relationship was stronger in naïve plant communities where species  
193 did not share a common selection history. While this positive diversity–stability  
194 relationship in these naïve plant communities provides further support for the notion  
195 that diversity is a key component underlying ecosystem stability, it also indicates that  
196 the effects of plant diversity on stability may be particularly strong in newly  
197 assembled plant communities. The weaker effect of diversity on stability in the co-  
198 selected communities was due to greater stability at lower diversity in comparison to  
199 the naïve plant communities. These findings suggested that the evolutionary history of  
200 co-occurring species compensated for lower biodiversity by exhibiting a more stable  
201 productivity and, conversely, that biodiversity in naïve communities could partly  
202 compensate for a lack of evolutionarily increased ecosystem stability.

203 The modified diversity–stability relationship between the co-selected and  
204 naïve plant communities may at least in part have been due to the dampening effect of  
205 community evolution on the positive relationship between species asynchrony and  
206 stability. As expected, species asynchrony increased stability overall. However, in co-  
207 selected communities, species asynchrony was less positively associated with  
208 stability, indicating community evolution led to a partial decoupling of asynchrony  
209 and stability and thus allowed for higher stability at low diversity compared with  
210 naïve communities. More specifically, in communities where species synchrony was

211 high, such as in less diverse communities, co-selected plant communities were  
212 generally more stable than naïve plant communities. At low diversity, species in co-  
213 selected communities compared with species in naïve communities were also  
214 generally less temporally variable in their productivity (see significant interaction  
215 plant history x species richness in Table 1). Therefore, the co-selected plant  
216 communities with low asynchrony were able to maintain greater community stability.  
217 On the other hand, the stronger coupling between asynchrony and stability allowed  
218 naïve compared with co-selected communities to have a more stable productivity at  
219 high diversity, where species fluctuated more asynchronously through time.

220         The reduced temporal stability at low synchrony in our co-selected plant  
221 communities (see Fig. 1c) may be due to the effect of community evolution on species  
222 competitive interactions. For instance, it has been previously shown that more diverse  
223 communities can result in the selection for characteristics by which individuals avoid  
224 competition and exhibit greater complementarity<sup>26,29</sup>. Such changes in species  
225 interactions can impact species dynamics and ultimately the stability of the net  
226 community productivity. This is because species competing more strongly with one  
227 another can exhibit greater asynchrony in their temporal performance since temporal  
228 variations in the environment may temporarily favor the competitive advantage of one  
229 species over another resulting in their negative temporal covariance<sup>15,20,41</sup>. Such  
230 destabilizing effects of evolution have been demonstrated in microalgae communities  
231 where a greater phylogenetic distance among community members results in weaker  
232 competitive interactions, that in turn reduces the competition-driven temporal  
233 asynchrony among species and the compensatory dynamics that are required to  
234 stabilize the net productivity of the communities<sup>28</sup>.

235           The interactions between plants and their soil communities are well known to  
236 influence ecosystem functioning<sup>43</sup> and these interactions likely change over ecological  
237 time-scales<sup>44–46</sup>. We therefore anticipated that soils would play an important role in  
238 ecosystem stability. However, we found little evidence that our soil treatments  
239 influenced the temporal performance of plant communities under field conditions and  
240 did not have any interactive effects with the community-evolution treatments on the  
241 temporal performance of the plant communities. However, we did observe that the  
242 soils influenced the pre-flood productivity of the plant communities. In particular, we  
243 found that the pre-flood productivity was generally lower in communities grown in  
244 native soil, which might have been due to a greater density of antagonistic soil biota  
245 or the inoculated soils may have had a greater pool of available soil resources  
246 resulting from the soil sterilization process<sup>47</sup>. The difference between inoculated and  
247 native soils was, perhaps literally, “washed away” by the flood event. The flood event  
248 may thus have equalized the soil properties among soil treatments and consequently  
249 dampened any potential plant–soil interactions that have been observed elsewhere to  
250 influence ecosystem stability<sup>48,49</sup>.

251

### 252 *Responses to an extreme flood event*

253           Our study system was exposed to a naturally occurring extreme flood event  
254 that strongly reduced the productivity of the plant communities<sup>50</sup>. Here we took  
255 advantage of this to further assess the hypothesis that community evolution may  
256 enhance ecosystem stability in response to disturbance events, due to greater  
257 resistance, recovery or resilience. Biodiversity decreased resistance, confirming  
258 previous findings<sup>11,24</sup>, but the relationship was context-dependent. Community  
259 evolution reduced resistance to flooding at high diversity (see Fig. 3a). This lower

260 resistance can be attributed to greater pre-flood productivity of the co-selected  
261 communities. In this sense, co-selected communities had “more to lose” when faced  
262 with this extreme climate event, an observation reported also in other grassland  
263 systems in response to drought<sup>11</sup>. Thus, overall the reduced productivity of naïve  
264 communities resulted in less absolute loss in productivity due to the flood and their  
265 greater resistance. It was previously shown that selection for niche differentiation  
266 results in higher community productivity<sup>26</sup>. Our results indicate that the selection-  
267 driven increase in productivity may consequently reduce the resistance to extreme  
268 climate events at higher levels of diversity. However, the greater productivity of co-  
269 selected plant communities may have also allowed them to recover back to their pre-  
270 disturbed state and maintain a more stable post-flood productivity. This is supported  
271 by our analysis using pre-flood productivity as a covariate (see Supporting  
272 Information, Fig. S2, Table S3). Once we corrected for the pre-flood productivity,  
273 species richness increased resilience in both co-selected and naïve communities, and  
274 we observed a strong interactive effect of community evolution and species richness  
275 for ecosystem resistance (Table 2).

276 Biodiversity had a strong positive effect on the recovery and, in the naïve  
277 communities also on resilience of the plant communities, paralleling numerous other  
278 studies emphasizing the importance of biodiversity for ecosystem recovery and  
279 resilience<sup>4,11,12,26</sup>. In addition, community evolution further increased recovery and  
280 resilience (see Fig. 3c, e). The positive effect of community evolution on post-flood  
281 recovery suggests that the local environment may have acted as a selective filter on  
282 these plant communities. The ancestral communities of the co-selected plants were  
283 initially sown into the field site in 2002, which is a natural floodplain where the plant  
284 communities were exposed to environmental conditions related to soil moisture

285 saturation at previous milder flood events in winter 2003 and winter 2005 (personal  
286 communication with C. Roscher) than the one in 2013 and thus selection likely  
287 favored individuals with traits that allowed them to perform well under such  
288 conditions and recover more rapidly<sup>51</sup>. It has also been shown that community  
289 evolution can result in increased plant species complementarity in this system<sup>26</sup>. In  
290 line with this, the result that community evolution in these plant communities resulted  
291 in greater recovery may be suggestive of selection for greater facilitative effects after  
292 the perturbation as may be anticipated under the stress-gradient hypothesis<sup>53</sup>.

293         The greater recovery in the co-selected communities also resulted in a greater  
294 resilience up to a diversity level of 4 species and was followed by an increased post-  
295 flood stability compared with naïve communities. This means that community  
296 evolution aided the return of the functioning of these communities to their pre-  
297 perturbed state and their pre-perturbation temporal performance. Our results  
298 demonstrate that community evolution can have strong effects on altering the  
299 population- and community-level mechanisms underpinning increased stability in  
300 ecosystem productivity, specifically mechanisms relating synchrony, recovery, and  
301 resilience. Finally, it is important to note that the greater post-flood stability in our  
302 study was not due to compositional changes as indicated by the similar compositional  
303 turnover between naïve and co-selected plant communities. Thus, the increased  
304 resistance and post-flood stability can be attributed to the greater recovery and post-  
305 flood performance of the individual species functioning in concert. We suggest that  
306 genetic changes within the species comprising the co-selected communities were  
307 responsible for the increased stability. In a study comparing plant individuals within  
308 species from different selection backgrounds in the Jena Experiment (high vs. low  
309 diversity), we did not find evidence for epigenetic divergence, but a strong genetic

310 signal<sup>39</sup>. Likely two different evolutionary processes — co-selection between the  
311 species within each particular community composition and “diffuse” co-selection  
312 among all species within the community — have improved the species’ abilities to  
313 function more complementarily with other species in the community<sup>26,29</sup>.

314

### 315 *Conclusions*

316 Our findings show that ecosystem stability and recovery can not only be  
317 promoted by biodiversity but also by evolutionary processes in plant communities  
318 over the time scales at which stability is being measured. In particular, we found that  
319 community evolution can enhance the stability of ecosystem productivity when  
320 diversity is low, whereas in the absence of community evolution a greater diversity  
321 was more critical for increasing stability. The community evolution-driven increase in  
322 ecosystem stability and recovery was likely linked to the selection on individual plant  
323 characteristics that facilitated greater recovery in these plant communities. If  
324 evolution in grassland communities increases ecosystem resilience and stability,  
325 maintaining co-selected plant communities could be a crucial precaution under global  
326 change and increased frequency of extreme climatic events<sup>6,7</sup>. Furthermore,  
327 integrating evolutionary processes into the temporal changes in biodiversity–  
328 ecosystem functioning relationships is likely to be a promising future avenue for  
329 predicting how ecosystems may respond to climatic extremes and biodiversity loss.

330

### 331 **Methods**

332 **Field site.** This study was conducted at the Jena Experiment field site (Jena,  
333 Thuringia, Germany, 51 °N, 11 °E, 135 m a.s.l.) from 2011 to 2015. The Jena  
334 Experiment is a long-term biodiversity field experiment located on the banks of the  
335 Saale River. In 78 experimental field plots of different diversity levels, 60 central  
336 European grassland species are grown in a number of species combinations since  
337 2002<sup>54</sup>.

338

339 **Community-evolution treatments.** This study included eleven monocultures, twelve  
340 2-species mixtures, twelve 4-species mixtures and twelve 8-species mixtures for a  
341 total of 47 experimental plots. We used two community-evolution treatments: plants  
342 with eight years of shared community selection in these experimental plots (co-  
343 selected communities) and plants without a common selection history in the Jena  
344 Experiment (naïve communities). The naïve plant seeds without a common selection  
345 history were obtained from the same commercial seed supplier (Rieger Hofmann  
346 GmbH, in Blaufelden-Raboldshausen, Germany) who provided the seeds used for the  
347 establishment of the original Jena Experiment plant communities<sup>54</sup>. The supplied  
348 seeds originated from various field sites in Germany and have been cultivated by  
349 reseeded every year for at least five years in monoculture. Seeds of co-selected  
350 communities were produced in an experimental garden in Zurich, Switzerland, from  
351 cuttings that had been made in the Jena Experiment. The cuttings were planted in  
352 Zürich in the original species combination in plots fenced with plastic netting to  
353 reduce pollination between communities<sup>26</sup>. A small number of seeds were additionally  
354 collected directly in the plots of the Jena Experiment. The “selected” seeds were thus  
355 offspring of plant populations that had been sown in 2002 and grown until 2010 in  
356 plots of the Jena Experiment.

357           In January 2011, the seeds of co-selected and naïve communities were  
358 germinated in potting soil (BF4, De Baat; Holland) in a glasshouse in Zurich.  
359 Subsequently, the seedlings were transported back to the Jena Experiment field site  
360 and transplanted into 2 x 2 m subplots of the original plots (in March 2011). There  
361 were four 1 x 1 m quadrats with different soil treatments in each subplot (see next  
362 section) and each quadrat was split into two 1 x 0.5 m halves (“half-quadrats”). We  
363 planted seedlings of co-selected communities into one half and seedlings of naïve  
364 communities into the other half of each quadrat in a hexagonal pattern at a density of  
365 210 plants per m<sup>2</sup> with a 6-cm distance between individuals. We planted the species in  
366 equal proportions, but five species were excluded from both co-selected and naïve  
367 communities because they were no longer present in the original plot of the Jena  
368 Experiment. After transplanting, the seedlings received water every second day for six  
369 weeks.

370

371 **Soil treatments.** Within each 2 x 2 m subplot of the 47 plots of the Jena Experiment,  
372 we removed the original plant cover in September 2010 and used it for the plant  
373 propagation in the experimental garden in Zurich (see previous section).  
374 Subsequently, we excavated the soil to a depth of 0.35 m, added a 10-cm layer of sand  
375 to the bottom of the plots and covered it with a 0.5 mm mesh net. We separated the  
376 borders of the subplots and the quadrats by plastic frames. The excavated native soil  
377 from each of the plots was sieved and four soil treatments were prepared. Half of the  
378 soil (approximately 600 kg per plot) was  $\gamma$ -irradiated to remove the original soil biota.  
379 Half of this sterilized soil was then inoculated with 4% (by weight) of live sugar-beet  
380 soil and 4% of sterilized native soil of the corresponding plot (“neutral soil” obtained  
381 by inoculation). Live sugar-beet soil was added to create a neutral soil community and



382 was previously collected in an agricultural sugar-beet field not associated with the  
383 Jena Experiment, but with comparable soil properties. The second half of the  
384 sterilized soil was inoculated with 4% (by weight) of live sugar-beet soil and 4% of  
385 live native soil of the corresponding plot (“native soil” obtained by inoculation). The  
386 non-sterilized part of the excavated soil was used for the second two soil treatments.  
387 Half of this soil was filled back into one quadrat of the corresponding plot (“native  
388 soil”). The other half of the unsterilized soil was mixed among all plots and filled into  
389 the remaining quadrats. However, this fourth soil treatment was abandoned after two  
390 years, which is why this treatment is not included here.

391         The soils were left to rest in closed bags to allow for the soil chemistry to  
392 equalize and to encourage soil biota of the inocula to colonize the sterilized soil  
393 before planting. The soils were then added into the quadrats in December 2010 and all  
394 quadrats were covered with a net and a water permeable black sheet to avoid spilling  
395 between quadrats until seedling transplantation in March 2011.

396

397 **Sampling of aboveground biomass.** The test communities were weeded three times  
398 a year and the plants were cut to three cm above ground twice a year at typical  
399 grassland harvest times (late May and August) in central Europe. Plant material from  
400 a 50 x 20 cm area in the centre of each half-quadrat was collected to measure  
401 aboveground biomass. We sorted the biomass into species, dried it at 70°C and  
402 weighed the dried biomass. There were four May harvests (2012–2015) and three  
403 August harvest (2012–2015) because the experiment was terminated after the fourth  
404 May harvest in 2015.

405

406 **Natural flood event.** In June 2013, the field site was flooded due to heavy rains in

407 central Europe<sup>50,55</sup>. The flood duration (maximum 25 days) and depth of water  
408 (maximum of 40 cm) was variable among plots and quadrats due to small  
409 topographical differences among the plots in the experiment<sup>25</sup>. The variation in  
410 flooding severity was distributed across the diversity gradient and within subplots the  
411 quadrats and half-quadrats experienced the same flooding severity. We tested whether  
412 flood severity<sup>50</sup> influenced the diversity–stability relationship and any other of our  
413 dependent variables (data not shown). This was not the case, which made us exclude  
414 these indices in all analyses.

415

416 **Data analysis.** We first calculated the stability of ecosystem functioning as the  
417 inverse coefficient of variation ( $CV_{com}^{-1}$ ) in the net community biomass over six time  
418 points. We excluded the flooding time point to avoid any confounding effects of the  
419 dramatic biomass loss in response to the flood. The stability of a single community is  
420 thus the mean net community biomass ( $\mu_{com}$ ) divided by its standard deviation ( $\sigma_{com}$ ).  
421 To explain the change in stability with biodiversity and between the community-  
422 evolution treatments we split the community-level variation across the six harvests  
423 ( $CV_{com}$ ) into its two component parts, these being the weighted population variation  
424 ( $CV_{pop}$ ) and the species synchrony ( $\theta$ ) that are defined elsewhere<sup>18,22</sup>. Variation in  
425 these indices of stability, synchrony and population stability was analyzed with linear  
426 mixed-effects models. Fixed-effects terms were plant species richness (log scale),  
427 community-evolution treatment (plant history co-selected vs. naïve) and soil treatment  
428 (native, inoculated and neutral soil); subplots and quadrats were used as random-  
429 effects terms to get appropriate errors for significance tests<sup>56</sup>.

430 We calculated the resistance, recovery and resilience (see Fig. 2) to assess the  
431 communities' responses to the flood event. Resistance is the change in productivity

432 between the average of the three harvests prior to the flood and the productivity  
433 during the flood event, more negative values indicating lower resistance. Recovery is  
434 the difference in the biomass produced post-flood (averaged over the three post-flood  
435 harvests) from the biomass produced during the flood event, where positive values  
436 indicate the amount of biomass recovered. Resilience is the difference between the  
437 pre- and post-flood biomasses where positive values indicate communities that were  
438 more productive after than before the flood event, whereas negative values indicate  
439 that the post-flood productivity had not returned to its pre-flood state. Variation in  
440 resistance, recovery and resilience was analyzed with linear mixed-effects models.  
441 Fixed-effects terms were plant species richness (log scale), community-evolution  
442 treatment (plant history co-selected vs. naïve) and soil treatment (native, inoculated  
443 and neutral soil); subplots and quadrats were used as random-effects terms. Since the  
444 measures of resistance, recovery and resilience can be dependent upon the magnitude  
445 of the pre-flood productivity<sup>24,57</sup>, we created additional models which included the  
446 pre-flood productivity as a covariate (see Supporting Information).

447 We calculated the species compositional turnover between pre- and post-flood  
448 conditions. Because it includes species abundances, we used the Bray-Curtis  
449 dissimilarity between pre-flood abundances of species (averaged over the three pre-  
450 flood harvests) and the post-flood abundances of species (averaged over the three  
451 post-flood harvests). The analysis was the same as for the resistance, recovery and  
452 resilience measures. We also analyzed pre-flood (three harvests before the flooding  
453 event) and post-flood (three harvests after the flooding event) stability in the same  
454 way as described at the beginning of this section.

455 All analyses were conducted using the software R, version 3.2.4<sup>58</sup>. Mixed  
456 models using residual maximum likelihood (REML) were fitted using the package  
457 ASReml for R<sup>59</sup> and the package ‘Pascal’ available at GitHub<sup>56</sup>.

458

## 459 **References**

460

- 461 1. Tilman, D., Reich, P. B. & Knops, J. M. H. Biodiversity and ecosystem stability  
462 in a decade-long grassland experiment. *Nature* **441**, 629–632 (2006).
- 463 2. Proulx, R. *et al.* Diversity promotes temporal stability across levels of ecosystem  
464 organization in experimental grasslands. *PLoS ONE* **5**, e13382 (2010).
- 465 3. Tilman, D. & Downing, J. A. Biodiversity and stability in grasslands. *Nature* **367**,  
466 363–365 (1994).
- 467 4. Isbell, F. *et al.* Biodiversity increases the resistance of ecosystem productivity to  
468 climate extremes. *Nature* **526**, 574–577 (2015).
- 469 5. Schläpfer, F. & Schmid, B. Ecosystem effects of biodiversity: a classification of  
470 hypotheses and exploration of empirical results. *Ecol. Appl.* **9**, 893–912 (1999).
- 471 6. Stocker, T. F. *et al.* Technical summary IPCC 2013. in *Climate Change 2013: The*  
472 *Physical Science Basis. Contribution of Working Group I to the Fifth Assessment*  
473 *Report of the Intergovernmental Panel on Climate Change* 33–115 (Cambridge  
474 University Press, 2013).
- 475 7. Rockström, J. *et al.* A safe operating space for humanity. *Nature* **461**, 472–475  
476 (2009).
- 477 8. Oliver, T. H. *et al.* Biodiversity and resilience of ecosystem functions. *Trends*  
478 *Ecol. Evol.* **30**, 673–684 (2015).

- 479 9. Wagg, C. *et al.* Plant diversity maintains long-term ecosystem productivity under  
480 frequent drought by increasing short-term variation. *Ecology* **98**, 2952–2961  
481 (2017).
- 482 10. Caldeira, M. C., Hector, A., Loreau, M. & Pereira, J. S. Species richness,  
483 temporal variability and resistance of biomass production in a Mediterranean  
484 grassland. *Oikos* **110**, 115–123 (2005).
- 485 11. Van Ruijven, J. & Berendse, F. Diversity enhances community recovery, but not  
486 resistance, after drought. *J. Ecol.* **98**, 81–86 (2009).
- 487 12. Lloret, F., Keeling, E. G. & Sala, A. Components of tree resilience: effects of  
488 successive low-growth episodes in old ponderosa pine forests. *Oikos* **120**, 1909–  
489 1920 (2011).
- 490 13. Hautier, Y. *et al.* Anthropogenic environmental changes affect ecosystem stability  
491 via biodiversity. *Science* **348**, 336–340 (2015).
- 492 14. Gross, K. *et al.* Species richness and the temporal stability of biomass production:  
493 a new analysis of recent biodiversity experiments. *Am. Nat.* **183**, 1–12 (2014).
- 494 15. Tilman, D., Lehman, C. L. & Bristow, C. E. Diversity-stability relationships:  
495 statistical inevitability or ecological consequence? *Am. Nat.* **151**, 277–282 (1998).
- 496 16. Yachi, S. & Loreau, M. Biodiversity and ecosystem productivity in a fluctuating  
497 environment: the insurance hypothesis. *Proc. Natl. Acad. Sci.* **96**, 1463–1468  
498 (1999).
- 499 17. Hector, A. *et al.* General stabilizing effects of plant diversity on grassland  
500 productivity through population asynchrony and overyielding. *Ecology* **91**, 2213–  
501 2220 (2010).
- 502 18. Thibaut, L. M. & Connolly, S. R. Understanding diversity-stability relationships:  
503 towards a unified model of portfolio effects. *Ecol. Lett.* **16**, 140–150 (2013).

- 504 19. Isbell, F. *et al.* High plant diversity is needed to maintain ecosystem services.  
505 *Nature* **477**, 199–202 (2011).
- 506 20. Gonzalez, A. & Loreau, M. The causes and consequences of compensatory  
507 dynamics in ecological communities. *Annu. Rev. Ecol. Evol. Syst.* **40**, 393–414  
508 (2009).
- 509 21. Loreau, M., Mouquet, N. & Gonzalez, A. Biodiversity as spatial insurance in  
510 heterogeneous landscapes. *Proc. Natl. Acad. Sci.* **100**, 12765–12770 (2003).
- 511 22. de Mazancourt, C. *et al.* Predicting ecosystem stability from community  
512 composition and biodiversity. *Ecol. Lett.* **16**, 617–625 (2013).
- 513 23. Leary, D. J. & Petchey, O. L. Testing a biological mechanism of the insurance  
514 hypothesis in experimental aquatic communities *J. of Anim. Ecol.* **78**, 1143–1151  
515 (2009).
- 516 24. Pfisterer, A. B. & Schmid, B. Diversity-dependent production can decrease the  
517 stability of ecosystem functioning. *Nature* **416**, 84–86 (2002).
- 518 25. Fischer, F. M. *et al.* Plant species richness and functional traits affect community  
519 stability after a flood event. *Philos. Trans. R. Soc. B Biol. Sci.* **371**, 20150276  
520 (2016).
- 521 26. Zuppinge-Dingley, D. *et al.* Selection for niche differentiation in plant  
522 communities increases biodiversity effects. *Nature* **515**, 108–111 (2014).
- 523 27. Cadotte, M. W., Dinnage, R. & Tilman, D. Phylogenetic diversity promotes  
524 ecosystem stability. *Ecology* **93**, S223–S233 (2012).
- 525 28. Venail, P. A., Alexandrou, M. A., Oakley, T. H. & Cardinale, B. J. Shared  
526 ancestry influences community stability by altering competitive interactions:  
527 evidence from a laboratory microcosm experiment using freshwater green algae.  
528 *Proc. R. Soc. B Biol. Sci.* **280**, 20131548–20131548 (2013).

- 529 29. van Moorsel, S. J. *et al.* Community evolution increases plant productivity at low  
530 diversity. *Ecol. Lett.* **21**, 128–137 (2018).
- 531 30. Fiegna, F., Moreno-Letelier, A., Bell, T. & Barraclough, T. G. Evolution of  
532 species interactions determines microbial community productivity in new  
533 environments. *ISME J.* **9**, 1235–1245 (2014).
- 534 31. Fiegna, F., Scheuerl, T., Moreno-Letelier, A., Bell, T. & Barraclough, T. G.  
535 Saturating effects of species diversity on life-history evolution in bacteria. *Proc.*  
536 *R. Soc. B Biol. Sci.* **282**, 20151794 (2015).
- 537 32. Lawrence, D. *et al.* Species interactions alter evolutionary responses to a novel  
538 environment. *PLoS Biol.* **10**, e1001330 (2012).
- 539 33. Garssen, A. G., Baattrup-Pedersen, A., Voesenek, L. A. C. J., Verhoeven, J. T. A.  
540 & Soons, M. B. Riparian plant community responses to increased flooding: a  
541 meta-analysis. *Glob. Change Biol.* **21**, 2881–2890 (2015).
- 542 34. Cardinale, B. J. *et al.* Impacts of plant diversity on biomass production increase  
543 through time because of species complementarity. *Proc. Natl. Acad. Sci.* **104**,  
544 18123–18128 (2007).
- 545 35. Reich, P. B. *et al.* Impacts of biodiversity loss escalate through time as  
546 redundancy fades. *Science* **336**, 589–592 (2012).
- 547 36. Meyer, S. T. *et al.* Effects of biodiversity strengthen over time as ecosystem  
548 functioning declines at low and increases at high biodiversity. *Ecosphere* **7**,  
549 e01619 (2016).
- 550 37. Verhoeven, K. J. F., vonHoldt, B. M. & Sork, V. L. Epigenetics in ecology and  
551 evolution: what we know and what we need to know. *Mol. Ecol.* **25**, 1631–1638  
552 (2016).

- 553 38. van Gorp, T. P. *et al.* epiGBS: reference-free reduced representation bisulfite  
554 sequencing. *Nat. Methods* **13**, 322–324 (2016).
- 555 39. van Moorsel, S. J. Community evolution increases ecosystem functioning and  
556 stability. (University of Zurich, 2017).
- 557 40. Barrett, R. & Schluter, D. Adaptation from standing genetic variation. *Trends*  
558 *Ecol. Evol.* **23**, 38–44 (2008).
- 559 41. Isbell, F. I., Polley, H. W. & Wilsey, B. J. Biodiversity, productivity and the  
560 temporal stability of productivity: patterns and processes. *Ecol. Lett.* **12**, 443–451  
561 (2009).
- 562 42. Loreau, M. & de Mazancourt, C. Species synchrony and its drivers: Neutral and  
563 nonneutral community dynamics in fluctuating environments. *Am. Nat.* **172**, E48–  
564 E66 (2008).
- 565 43. van der Putten, W. H. *et al.* Plant-soil feedbacks: the past, the present and future  
566 challenges. *J. Ecol.* **101**, 265–276 (2013).
- 567 44. Lau, J. A. & Lennon, J. T. Rapid responses of soil microorganisms improve plant  
568 fitness in novel environments. *Proc. Natl. Acad. Sci.* **109**, 14058–14062 (2012).
- 569 45. terHorst, C. P., Lennon, J. T. & Lau, J. A. The relative importance of rapid  
570 evolution for plant-microbe interactions depends on ecological context. *Proc. R.*  
571 *Soc. B Biol. Sci.* **281**, 20140028–20140028 (2014).
- 572 46. Zuppinger-Dingley, D., Flynn, D. F. B., De Deyn, G. B., Petermann, J. S. &  
573 Schmid, B. Plant selection and soil legacy enhance long-term biodiversity effects.  
574 *Ecology* **97**, 918–928 (2016).
- 575 47. Gebremikael, M. T., De Waele, J., Buchan, D., Soboksa, G. E. & De Neve, S. The  
576 effect of varying gamma irradiation doses and soil moisture content on



- 577 nematodes, the microbial communities and mineral nitrogen. *Appl. Soil Ecol.* **92**,  
578 1–13 (2015).
- 579 48. Yang, G. *et al.* The interaction between arbuscular mycorrhizal fungi and soil  
580 phosphorus availability influences plant community productivity and ecosystem  
581 stability. *J. Ecol.* **102**, 1072–1082 (2014).
- 582 49. Pellkofer, S., van der Heijden, M. G. A., Schmid, B. & Wagg, C. Soil  
583 communities promote temporal stability and species asynchrony in experimental  
584 grassland communities. *PLoS ONE* **11**, e0148015 (2016).
- 585 50. Wright, A. J. *et al.* Flooding disturbances increase resource availability and  
586 productivity but reduce stability in diverse plant communities. *Nat. Commun.* **6**,  
587 6092 (2015).
- 588 51. Wright, A. J. *et al.* Plants are less negatively affected by flooding when growing  
589 in species-rich plant communities. *New Phytol.* **213**, 645–656 (2017).
- 590 52. Loeuille, N. Influence of evolution on the stability of ecological communities:  
591 Evolution and stability of communities. *Ecol. Lett.* **13**, 1536–1545 (2010).
- 592 53. Callaway, R. M. *et al.* Positive interactions among alpine plants increase with  
593 stress. *Nature* **417**, 844 (2002).
- 594 54. Roscher, C. *et al.* The role of biodiversity for element cycling and trophic  
595 interactions: an experimental approach in a grassland community. *Basic Appl.*  
596 *Ecol.* **5**, 107–121 (2004).
- 597 55. Blöschl, G., Nester, T., Komma, J., Parajka, J. & Perdigão, R. A. P. The June  
598 2013 flood in the Upper Danube Basin, and comparisons with the 2002, 1954 and  
599 1899 floods. *Hydrol. Earth Syst. Sci.* **17**, 5197–5212 (2013).
- 600 56. Schmid, B., Baruffol, M., Wang, Z. & Niklaus, P. A. A guide to analyzing  
601 biodiversity experiments. *J. Plant Ecol.* **10**, 91–110 (2017).

602 57. Wang, Y., Yu, S. & Wang, J. Biomass-dependent susceptibility to drought in  
603 experimental grassland communities. *Ecol. Lett.* **10**, 401–410 (2007).

604 58. R Development Core Team. *R: a language and environment for statistical*  
605 *computing*. (R Foundation for Statistical Computing, Vienna, Austria, 2017).

606 59. Butler, D. *asreml: asmrel() fits the linear mixed model*. (VSNI International,  
607 2009).

608

### 609 **Additional information**

610

611 **Supplementary information** is available for this paper online.

612 **Data availability.** Data for this study are available from the corresponding author and  
613 will be made publicly available upon acceptance on the Pangaea repository.

614 **Code availability.** All R scripts are available upon request from the corresponding  
615 author C.W.

616

### 617 **Acknowledgements**

618 Thanks to Debra Zuppinger-Dingley, Dan Flynn and Varuna Yadav for the  
619 establishment of the experimental plots. Thanks to the Jena Experiment for providing  
620 infrastructure and help and to D. Trujillo and M. Furler for technical assistance. This  
621 study was supported by the Swiss National Science Foundation (grant numbers  
622 130720, 147092 and 166457 to B.S.) and the University Research Priority Program  
623 Global Change and Biodiversity of the University of Zurich. The Jena Experiment is  
624 funded by the Deutsche Forschungsgemeinschaft (DFG, German Research  
625 Foundation, FOR1451).

626

627 **Author contributions**

628 B.S. designed research, T.H. and S.J.V.M. performed research; S.J.V.M., C.W. and

629 B.S. analyzed data; S.J.V.M., B.S. and C.W. wrote the paper with substantial

630 contributions of the other authors.

631

632 **Competing interests**

633 The authors declare no conflicts of interest.

634

635 FIGURES & TABLES

636

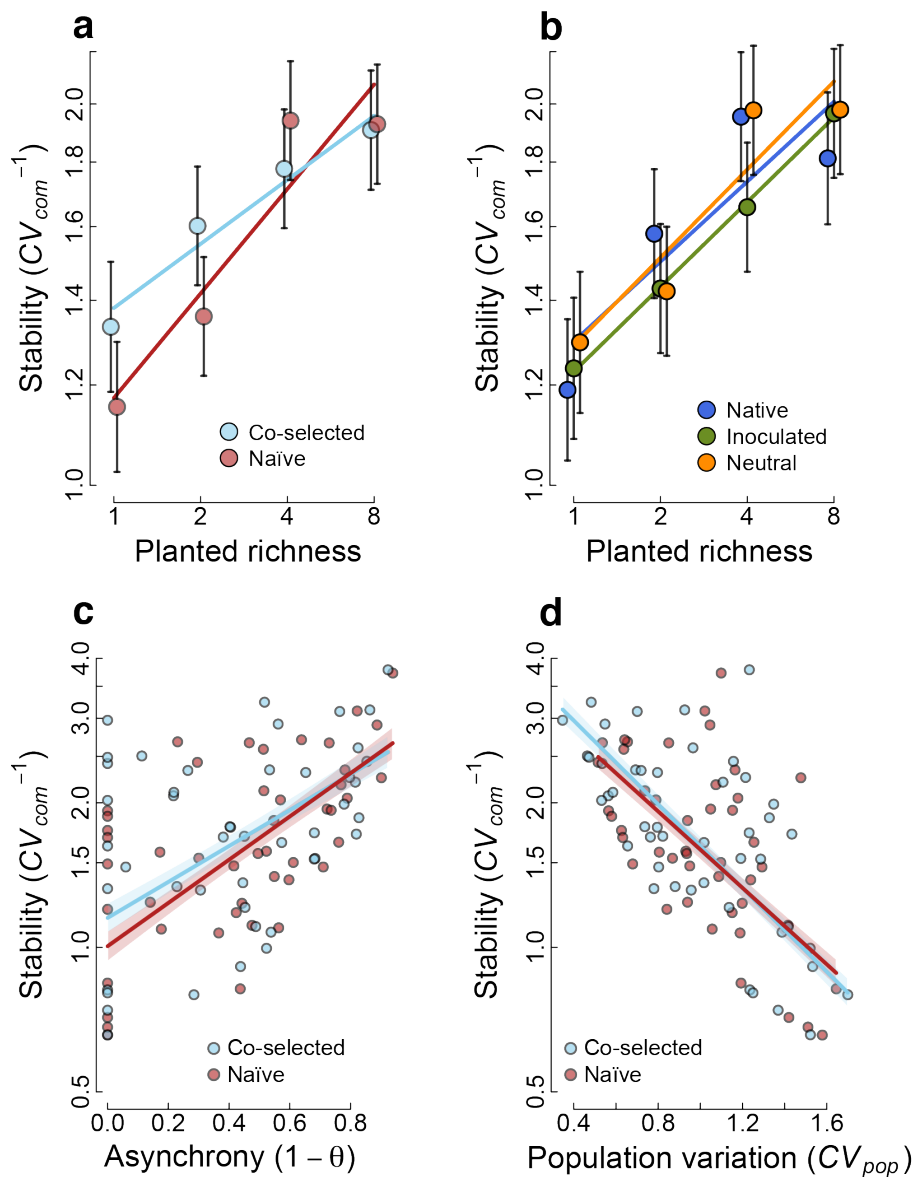

637

638 **Fig. 1 | The biodiversity–stability relationship in response to community-**

639 **evolution and soil treatments. a,** Greater plant diversity is required for greater

640 stability, but more strongly so in naïve communities (plant history x species richness

641 (log-transformed):  $F_{1, 135.0} = 4.794, P = 0.030$ ). **b,** Different soils did not alter the

642 overall biodiversity–stability relationship (soil treatment x species richness (log-

643 transformed):  $F_{2, 87.1} = 0.048, P = 0.954$ ). The three soil treatments were: native soil,

644 sterilized soil inoculated with native soil (inoculated) and sterilized soil (neutral).

645 Means and standard errors are shown for each diversity level. **c**, Stability increased  
646 with asynchrony strongly for both naïve and selected communities (main effect  
647 asynchrony:  $F_{1, 204.5} = 84.55$ ,  $P = <0.001$ ) but stability increased more steeply with  
648 asynchrony in naïve plant communities than in co-selected communities (plant history  
649 x asynchrony interaction:  $F_{1, 145.8} = 3.93$ ,  $P = 0.049$ ). **d**, The relationship between  
650 stability and population variation was not altered by community evolution (plant  
651 history x population CV:  $F_{1, 160.3} = 1.348$ ,  $P = 0.247$ ).  
652

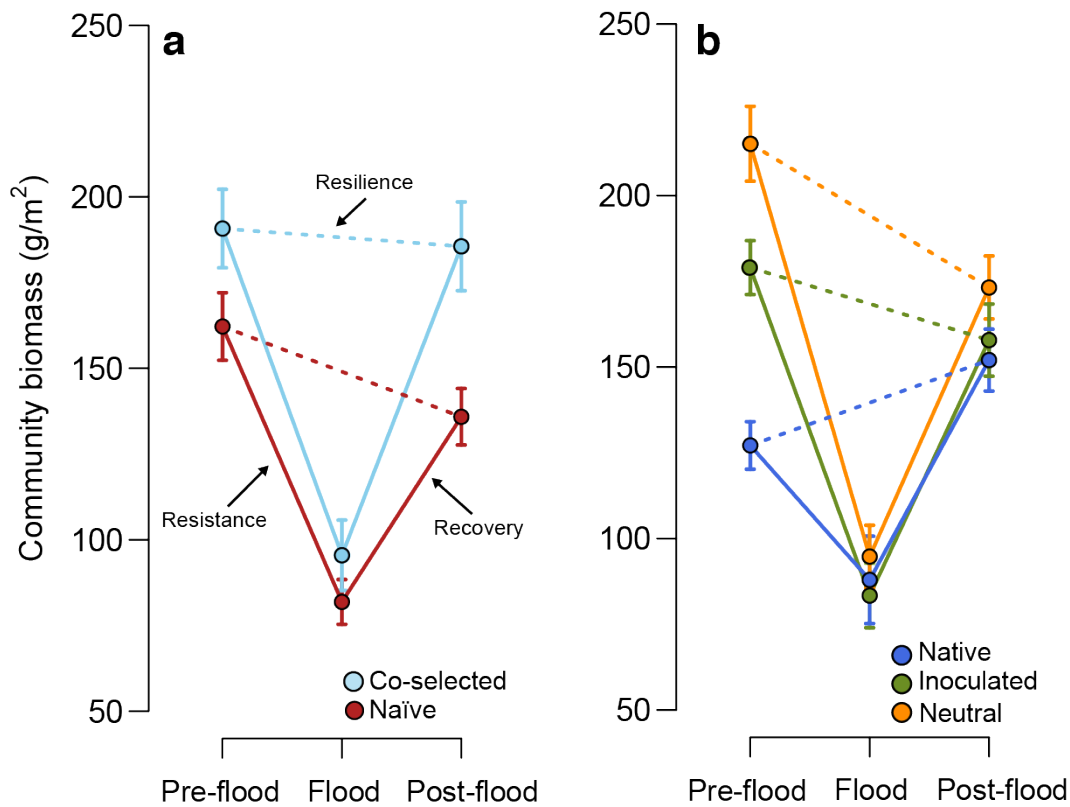

653

654 **Fig. 2 | The flood event greatly reduced ecosystem productivity.** Points indicate **a**,  
655 the average productivity for co-selected and naïve plant communities and **b**, the  
656 average productivity for the three soil treatments native soil, sterilized soil inoculated  
657 with native soil (inoculated) and sterilized soil (neutral). Resistance is the change in  
658 productivity between the average of the three harvests prior to the flood and the  
659 productivity during the flood event (label “Flood” on x-axis corresponding to August  
660 2013). Recovery is the change in productivity from this level to the average of the  
661 three post-flood harvests. Resilience is the change from the average of the three pre-  
662 flood harvests to the average of the three post-flood harvests.

663

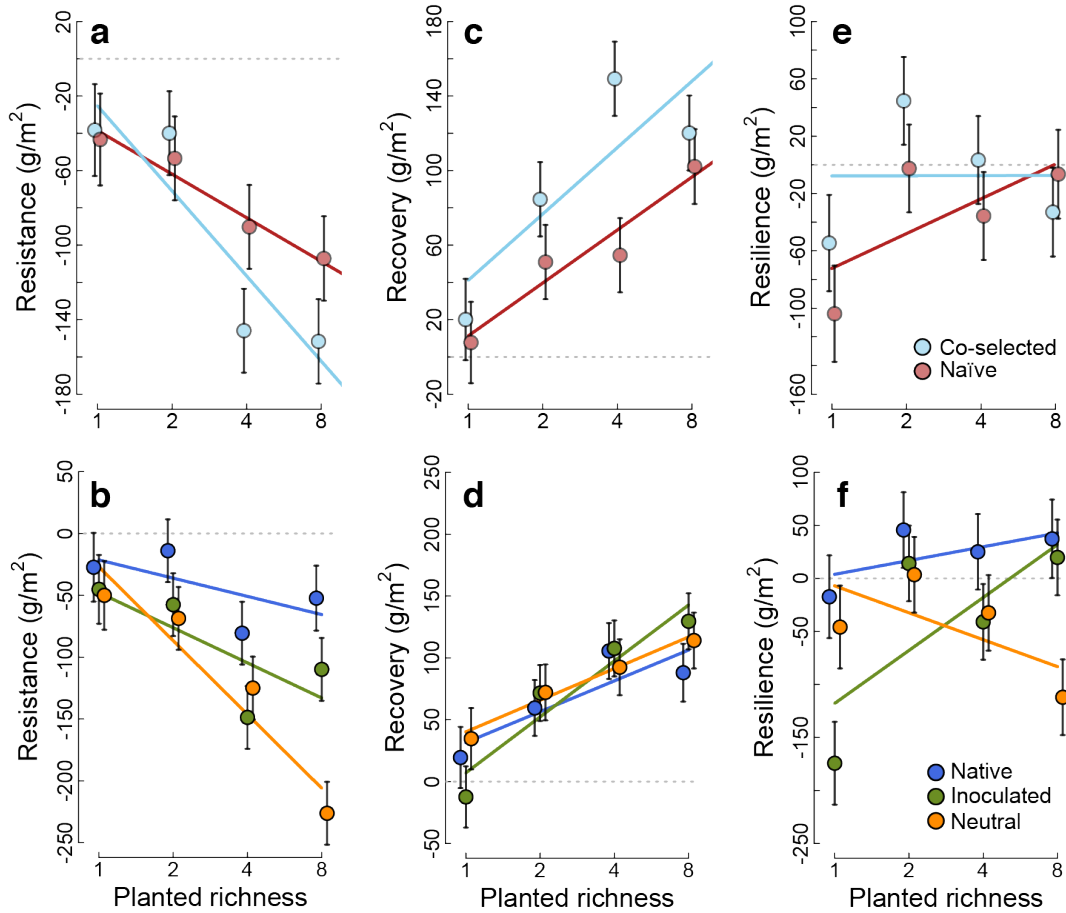

664

665 **Fig. 3 | Resistance, recovery and resilience responses to a major flood event.**

666 Biodiversity–resistance relationships are shown in response to **a**, community-

667 evolution and **b**, soil treatments. Biodiversity–recovery relationships are shown in

668 response to **c**, community-evolution and **d**, soil treatments. Biodiversity–resilience

669 relationships are shown in response to **e**, community-evolution and **f**, soil treatments.

670 Means and standard errors are shown for each diversity level.

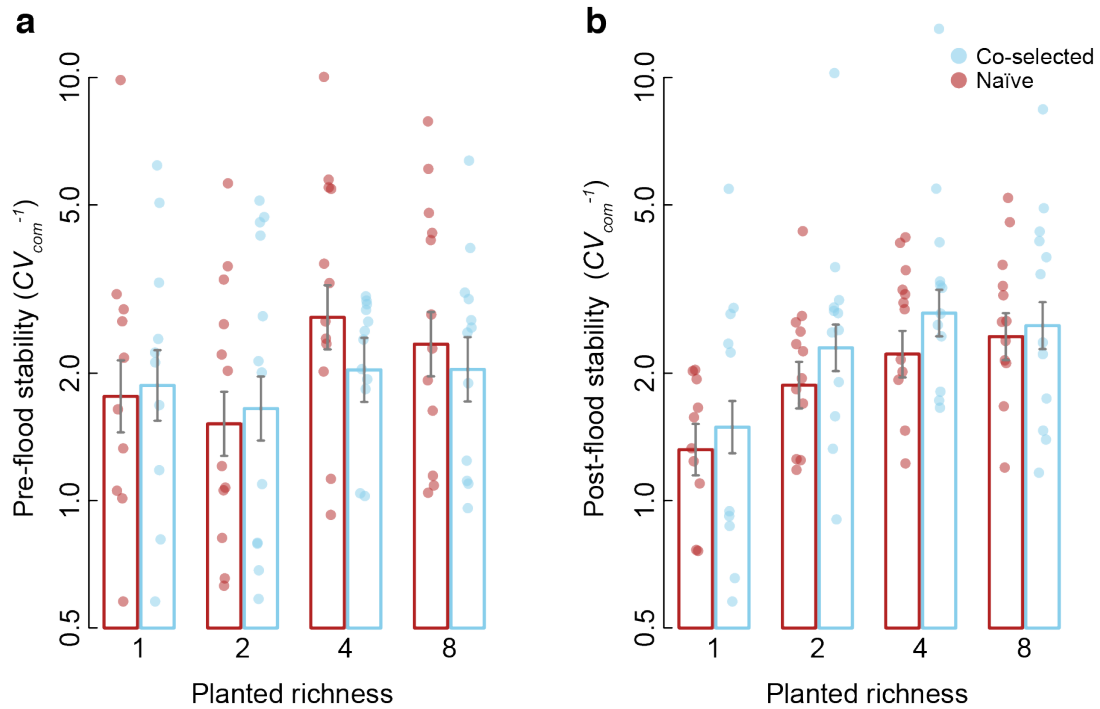

671

672 **Fig. 4 | Influence of the community-evolution treatments on stability pre-flood vs.**

673 **post-flood.** Means for each diversity and community-evolution treatment with error

674 bars indicating the model-estimated standard error are shown. **a**, naïve plant

675 communities and co-selected communities were equally stable pre-flood ( $F_{1, 130.8} =$

676 1.54,  $P = 0.217$ ). **b**, co-selected plant communities were more stable than naïve plant

677 communities post-flood ( $F_{1, 131.6} = 4.94$ ,  $P = 0.028$ ). Results are presented on a log-

678 scale.

679



680 **Table 1 | Mixed-model ANOVA results for stability, population variance and**

681 **synchrony.** The effects of species richness (log-scale), community-evolution (plant

682 history) and soil treatments on the stability of community productivity, population

683 variance and synchrony across the entire experimental period from 2012–2015. The

684 time point of the flooding event was excluded in the calculations of stability,

685 population variance and asynchrony to prevent any confounding effects of the flood.

686 Bold italic text highlights significant effects.

| Fixed terms                | Stability  |                    |                     |                     | Population variance |                    |                     | Asynchrony         |                   |                         |
|----------------------------|------------|--------------------|---------------------|---------------------|---------------------|--------------------|---------------------|--------------------|-------------------|-------------------------|
|                            | $DF_{num}$ | $DF_{den}$         | $F$                 | $P$                 | $DF_{den}$          | $F$                | $P$                 | $DF_{den}$         | $F$               | $P$                     |
| Log richness ( $R_{log}$ ) | 1          | <b><i>44.1</i></b> | <b><i>10.74</i></b> | <b><i>0.002</i></b> | <b><i>44.1</i></b>  | <b><i>5.27</i></b> | <b><i>0.027</i></b> | <b><i>44.1</i></b> | <b><i>143</i></b> | <b><i>&lt;0.001</i></b> |
| Plant history (PH)         | 1          | 135                | 1.805               | 0.181               | 135                 | 3.79               | 0.054               | 135                | 0.5               | 0.479                   |
| Soil treatment (SH)        | 2          | 87.1               | 0.641               | 0.529               | 87.1                | 1.3                | 0.278               | 87.1               | 0.87              | 0.424                   |
| PH x $R_{log}$             | 1          | <b><i>135</i></b>  | <b><i>4.794</i></b> | <b><i>0.030</i></b> | <b><i>135</i></b>   | <b><i>8.38</i></b> | <b><i>0.004</i></b> | 135                | 0.05              | 0.830                   |
| SH x $R_{log}$             | 2          | 87.2               | 0.048               | 0.954               | 87.2                | 0.01               | 0.992               | 87.2               | 0.38              | 0.685                   |
| Random terms               | $N$        | $Var.$             | $SE$                |                     | $Var.$              | $SE$               |                     | $Var.$             | $SE$              |                         |
|                            |            | $10^{-3}$          | $10^{-3}$           |                     | $10^{-3}$           | $SE 10^{-3}$       |                     | $10^{-3}$          | $10^{-3}$         |                         |
| Plot                       | 46         | 100.1              | 25.9                |                     | 95.6                | 23.5               |                     | 17.9               | 4.57              |                         |
| Plot x SH                  | 137        | 15.5               | 10.9                |                     | 13.9                | 7.4                |                     | -0.05              | 1.96              |                         |
| Residual                   | 274        | 92.3               | 11.23               |                     | 58.4                | 7.1                |                     | 20.02              | 2.46              |                         |

687 *Note:*  $DF_{num}$  = numerator degrees of freedom,  $DF_{den}$  = denominator degrees of freedom,  $F$  =

688 variance ratio,  $P$  = probability of type-I error.

689

690 **Table 2 | Mixed effect ANOVA results for resistance, recovery and resilience.** The  
 691 effects of species richness (log-scale), community-evolution (plant history) and soil  
 692 treatments are shown for the changes in productivity due to flooding. Bold italic text  
 693 highlights significant effects.

| Fixed terms                 | Resistance              |                         |              |                  | Recovery                |              |                  | Resilience              |              |              |
|-----------------------------|-------------------------|-------------------------|--------------|------------------|-------------------------|--------------|------------------|-------------------------|--------------|--------------|
|                             | <i>DF<sub>num</sub></i> | <i>DF<sub>den</sub></i> | <i>F</i>     | <i>P</i>         | <i>DF<sub>den</sub></i> | <i>F</i>     | <i>P</i>         | <i>DF<sub>den</sub></i> | <i>F</i>     | <i>P</i>     |
| Log richness ( $R_{\log}$ ) | 1                       | <b>44.2</b>             | <b>9.413</b> | <b>0.004</b>     | <b>44.1</b>             | <b>15.95</b> | <b>&lt;0.001</b> | 44.2                    | 1.69         | 0.200        |
| Plant history (PH)          | 1                       | <b>135</b>              | <b>4.19</b>  | <b>0.043</b>     | <b>135</b>              | <b>14.5</b>  | <b>&lt;0.001</b> | 135                     | 3.476        | 0.064        |
| Soil treatment (SH)         | 2                       | <b>87.3</b>             | <b>14.07</b> | <b>&lt;0.001</b> | 87.2                    | 0.295        | 0.746            | <b>87.3</b>             | <b>6.116</b> | <b>0.003</b> |
| PH x $R_{\log}$             | 1                       | <b>135</b>              | <b>5.323</b> | <b>0.023</b>     | 135                     | 0.484        | 0.488            | 135                     | 2.65         | 0.106        |
| SH x $R_{\log}$             | 2                       | <b>87.5</b>             | <b>5.949</b> | <b>0.004</b>     | 87.4                    | 1.728        | 0.184            | <b>87.5</b>             | <b>6.97</b>  | <b>0.002</b> |
| Random terms                | <i>N</i>                | <i>Var.</i>             | <i>SE</i>    |                  | <i>Var.</i>             | <i>SE</i>    |                  | <i>Var.</i>             | <i>SE</i>    |              |
| Plot                        | 46                      | 3645.1                  | 1073.9       |                  | 2233.7                  | 771.4        |                  | 6909.8                  | 2237.8       |              |
| Plot x SH                   | 137                     | 775.2                   | 702.4        |                  | -157.6                  | 744.9        |                  | 1933.2                  | 1784.5       |              |
| Residual                    | 274                     | 6245.8                  | 760.2        |                  | 7851.01                 | 955.6        |                  | 15913.8                 | 1937         |              |

694

695 *Note:*  $DF_{num}$  = numerator degrees of freedom,  $DF_{den}$  = denominator degrees of freedom,  $F$  =

696 variance ratio,  $P$  = probability of type-I error.
